# Supplementary material
Source: PubMed Central journal article supplement (PMC7088966)

Supplemental figure

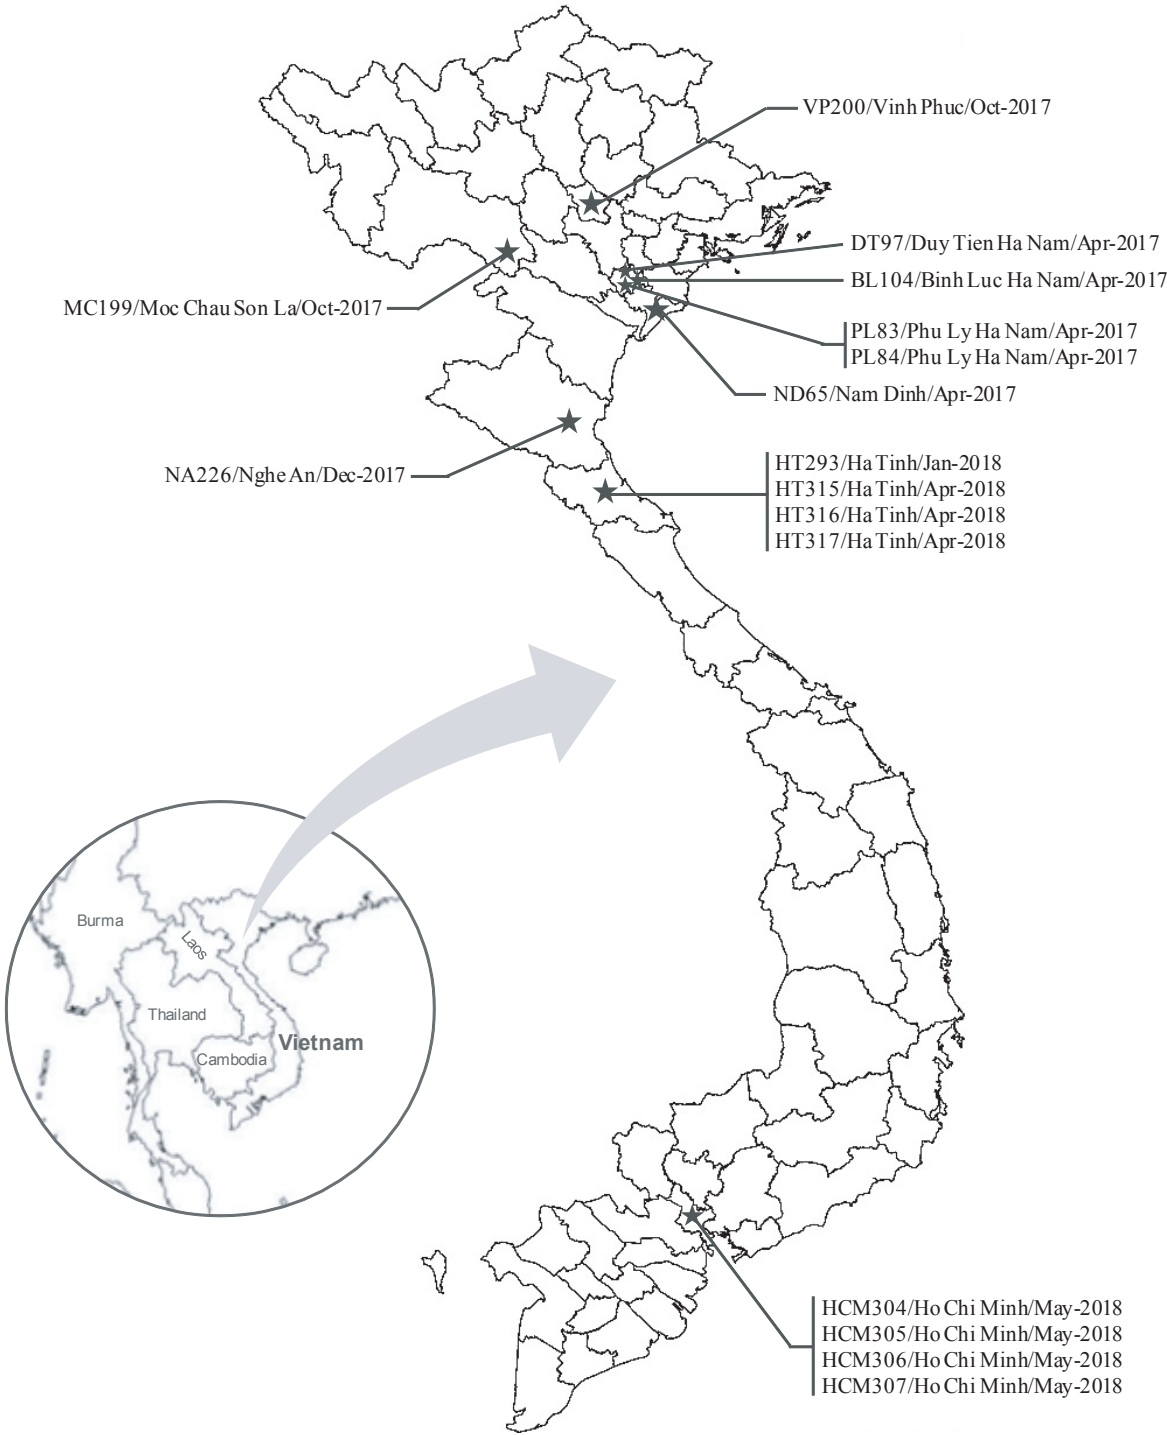

Supplement: 11262_2019_1647_MOESM1_ESM.pdf [file 11262_2019_1647_MOESM1_ESM.pdf]
